# Supplementary material for: Anti-Lymphangiogenic Terpenoids from the Heartwood of Taiwan Juniper, Juniperus chinensis var. tsukusiensis
Source: MDPI journal article supplement (doi:10.3390/plants12223828), 2023-11-11
Supplement: s1 [file s1]

# Anti-Lymphangiogenic Terpenoids from the Heartwood of Taiwan Juniper, *Juniperus chinensis* var. *tsukusiensis*

Ho-Cheng Wu <sup>1,2,3,4</sup>, Lung-Lin Shiu <sup>5</sup>, Shih-Wei Wang <sup>6,7,8</sup>, Chia-Ying Huang <sup>6,9</sup>, Tzong-Huei Lee <sup>10</sup>, Ping-Jyun Sung <sup>11,12</sup> and Yueh-Hsiung Kuo <sup>13,14,15,\*</sup>

<sup>1</sup> Graduate Institute of Pharmacognosy, College of Pharmacy, Taipei Medical University, Taipei 110, Taiwan; duncanwu762001@gmail.com

<sup>2</sup> Ph.D. Program in Clinical Drug Development of Herbal Medicine, College of Pharmacy, Taipei Medical University, Taipei 110, Taiwan

<sup>3</sup> School of Pharmacy, College of Pharmacy, Kaohsiung Medical University, Kaohsiung 807, Taiwan

<sup>4</sup> Traditional Herbal Medicine Research Center, Taipei Medical University Hospital, Taipei 110, Taiwan

<sup>5</sup> Department of Chemistry, National Taiwan University, Taipei 106, Taiwan; lunglin\_hsu@email.eternal-group.com

<sup>6</sup> Institute of Biomedical Sciences, MacKay Medical College, New Taipei City 252, Taiwan; shihwei@mmc.edu.tw (S.-W.W.); u101030042@gmail.com (C.-Y.H.)

<sup>7</sup> Department of Medicine, MacKay Medical College, New Taipei City 252, Taiwan

<sup>8</sup> Graduate Institute of Natural Products, College of Pharmacy, Kaohsiung Medical University, Kaohsiung 807, Taiwan

<sup>9</sup> Department of Chinese Medicine, MacKay Memorial Hospital, Taipei 104, Taiwan

<sup>10</sup> Institute of Fisheries Science, National Taiwan University, Taipei 106, Taiwan; thlee1@ntu.edu.tw

<sup>11</sup> National Museum of Marine Biology and Aquarium, Pingtung 944, Taiwan; pjsung@nmmba.gov.tw

<sup>12</sup> Department of Marine Biotechnology and Resources, National Sun Yat-sen University, Kaohsiung 804, Taiwan

<sup>13</sup> Department of Chinese Pharmaceutical Sciences and Chinese Medicine Resources, China Medical University, Taichung 404, Taiwan

<sup>14</sup> Chinese Medicine Research Center, China Medical University, Taichung 404, Taiwan

<sup>15</sup> Department of Biotechnology, Asia University, Taichung 413, Taiwan

\* Correspondence: kuoyh@mail.cmu.edu.tw; Tel.: +886-4-2205-3366 (ext. 5701)

## Supplementary data

Table S1. Isolation and purification methods of known compounds isolated from *J.*

|                                                                                                                                                          |    |
|----------------------------------------------------------------------------------------------------------------------------------------------------------|----|
| <i>chinensis</i> var. <i>tsukusiensis</i> .....                                                                                                          | 3  |
| Figure S1. <sup>1</sup> H NMR spectrum of 12-acetoxywiddrol ( <b>1</b> ) in CDCl <sub>3</sub> at 300 MHz .....                                           | 4  |
| Figure S2. DEPT spectrum of 12-acetoxywiddrol ( <b>1</b> ) .....                                                                                         | 4  |
| Figure S3. HRESIMS spectrum of 12-acetoxywiddrol ( <b>1</b> ) .....                                                                                      | 5  |
| Figure S4. <sup>1</sup> H NMR spectrum of cedrol-13-al ( <b>2</b> ) in CDCl <sub>3</sub> at 300 MHz .....                                                | 5  |
| Figure S5. DEPT spectrum of cedrol-13-al ( <b>2</b> ) .....                                                                                              | 6  |
| Figure S6. HRESIMS spectrum of cedrol-13-al ( <b>2</b> ) .....                                                                                           | 6  |
| Figure S7. <sup>1</sup> H NMR spectrum of α-corocalen-15-oic acid ( <b>3</b> ) in CDCl <sub>3</sub> at 400 MHz .....                                     | 7  |
| Figure S8. DEPT spectrum of α-corocalen-15-oic acid ( <b>3</b> ) .....                                                                                   | 7  |
| Figure S9. HRESIMS spectrum of α-corocalen-15-oic acid ( <b>3</b> ) .....                                                                                | 8  |
| Figure S10. <sup>1</sup> H NMR spectrum of 1,3,5-bisaoitrien-10-hydroperoxy-11-ol ( <b>4</b> ) in CDCl <sub>3</sub><br>at 400 MHz .....                  | 8  |
| Figure S11. DEPT spectrum of 1,3,5-bisaoitrien-10-hydroperoxy-11-ol ( <b>4</b> ) .....                                                                   | 9  |
| Figure S12. HRESIMS spectrum of 1,3,5-bisaoitrien-10-hydroperoxy-11-ol ( <b>4</b> ) .....                                                                | 9  |
| Figure S13. <sup>1</sup> H NMR spectrum of 1β,2β-epoxy-9α-hydroxy-8(14),11-totaradiene-3,13-<br>dione ( <b>5</b> ) in CDCl <sub>3</sub> at 400 MHz ..... | 10 |
| Figure S14. DEPT spectrum of 1β,2β-epoxy-9α-hydroxy-8(14),11-totaradiene-3,13-<br>dione ( <b>5</b> ) in CDCl <sub>3</sub> at 400 MHz .....               | 10 |
| Figure S15. HRESIMS spectrum of 1β,2β-epoxy-9α-hydroxy-8(14),11-totaradiene-<br>3,13-dione ( <b>5</b> ) in CDCl <sub>3</sub> at 400 MHz .....            | 11 |

Table S1. Isolation and purification methods of known compounds isolated from *J. chinensis* var. *tsukusiensis*

| Fraction | HPLC method                                                         | Obtained compounds (mg)                                                                                                                                                |
|----------|---------------------------------------------------------------------|------------------------------------------------------------------------------------------------------------------------------------------------------------------------|
| A        | EtOAc:CH <sub>2</sub> Cl <sub>2</sub> : <i>n</i> -Hexane = 5:5:90   | <b>34</b> (75.4 mg), <b>35</b> (26.4 mg), <b>36</b> (10.0 mg)                                                                                                          |
| B        | EtOAc:CH <sub>2</sub> Cl <sub>2</sub> : <i>n</i> -Hexane = 10:10:80 | <b>8</b> (2.0 mg), <b>10</b> (8.6 mg)                                                                                                                                  |
| C        | EtOAc:CH <sub>2</sub> Cl <sub>2</sub> : <i>n</i> -Hexane = 5:5:90   | <b>16</b> (5.6 mg)                                                                                                                                                     |
| D        | EtOAc:CH <sub>2</sub> Cl <sub>2</sub> : <i>n</i> -Hexane = 10:10:80 | <b>19</b> (2.3 mg), <b>30</b> (10.0 mg), <b>36</b> (10.0 mg)                                                                                                           |
| E        | EtOAc:CH <sub>2</sub> Cl <sub>2</sub> : <i>n</i> -Hexane = 10:10:80 | <b>29</b> (3.5 mg)                                                                                                                                                     |
| F        | EtOAc:CH <sub>2</sub> Cl <sub>2</sub> : <i>n</i> -Hexane = 10:5:85  | <b>29</b> (3.0 mg)                                                                                                                                                     |
| G        | EtOAc:CH <sub>2</sub> Cl <sub>2</sub> : <i>n</i> -Hexane = 10:5:85  | <b>22</b> (450.2 mg)                                                                                                                                                   |
| H        | EtOAc: <i>n</i> -Hexane = 20:80                                     | <b>11</b> (142.0 mg), <b>14</b> (16.0 mg), <b>20</b> (24.3 mg), <b>21</b> (6.7 mg), <b>24</b> (5.6 mg), <b>28</b> (35.6 mg), <b>32</b> (16.7 mg), <b>37</b> (15.0 mg), |
| I        | EtOAc:CH <sub>2</sub> Cl <sub>2</sub> : <i>n</i> -Hexane = 20:5:75  | <b>6</b> (3.0 mg), <b>13</b> (12.0 mg), <b>38</b> (10.0 mg)                                                                                                            |
| J        | EtOAc:CH <sub>2</sub> Cl <sub>2</sub> : <i>n</i> -Hexane = 20:5:75  | <b>26</b> (2.3 mg), <b>33</b> (363.0 mg)                                                                                                                               |
| K        | EtOAc: <i>n</i> -Hexane = 30:70                                     | <b>7</b> (12.0 mg)                                                                                                                                                     |
| L        | EtOAc:CH <sub>2</sub> Cl <sub>2</sub> : <i>n</i> -Hexane = 20:20:60 | <b>9</b> (3.6 mg), <b>15</b> (1.2 mg), <b>18</b> (3.8 mg), <b>23</b> (25.6 mg), <b>31</b> (13.7 mg),                                                                   |
| M        | EtOAc:CH <sub>2</sub> Cl <sub>2</sub> : <i>n</i> -Hexane = 40:20:40 | <b>12</b> (6.5 mg), <b>17</b> (35.5 mg)                                                                                                                                |
| N        | EtOAc:CH <sub>2</sub> Cl <sub>2</sub> : <i>n</i> -Hexane = 60:20:20 | <b>25</b> (13.5 mg), <b>27</b> (3.2 mg)                                                                                                                                |
| O        | EtOAc:CH <sub>2</sub> Cl <sub>2</sub> : <i>n</i> -Hexane = 60:20:20 |                                                                                                                                                                        |

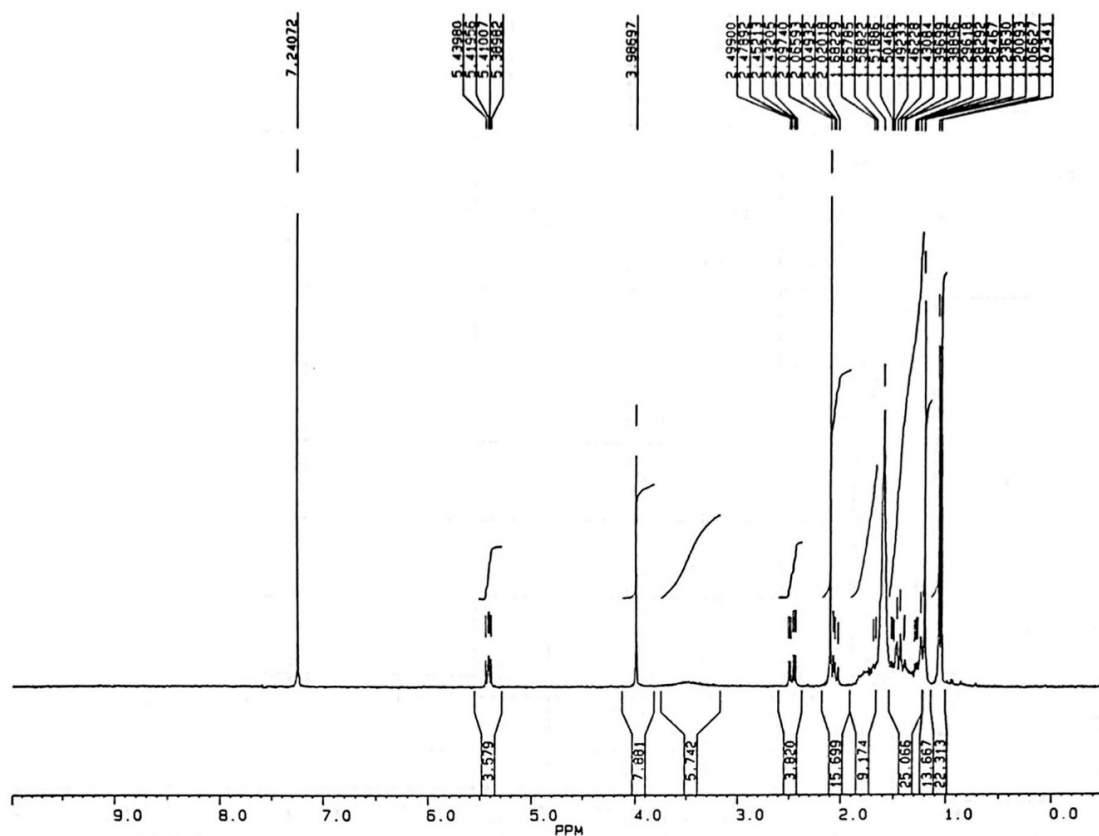

Figure S1. <sup>1</sup>H NMR spectrum of 12-acetoxywiddrol (**1**) in CDCl<sub>3</sub> at 300 MHz

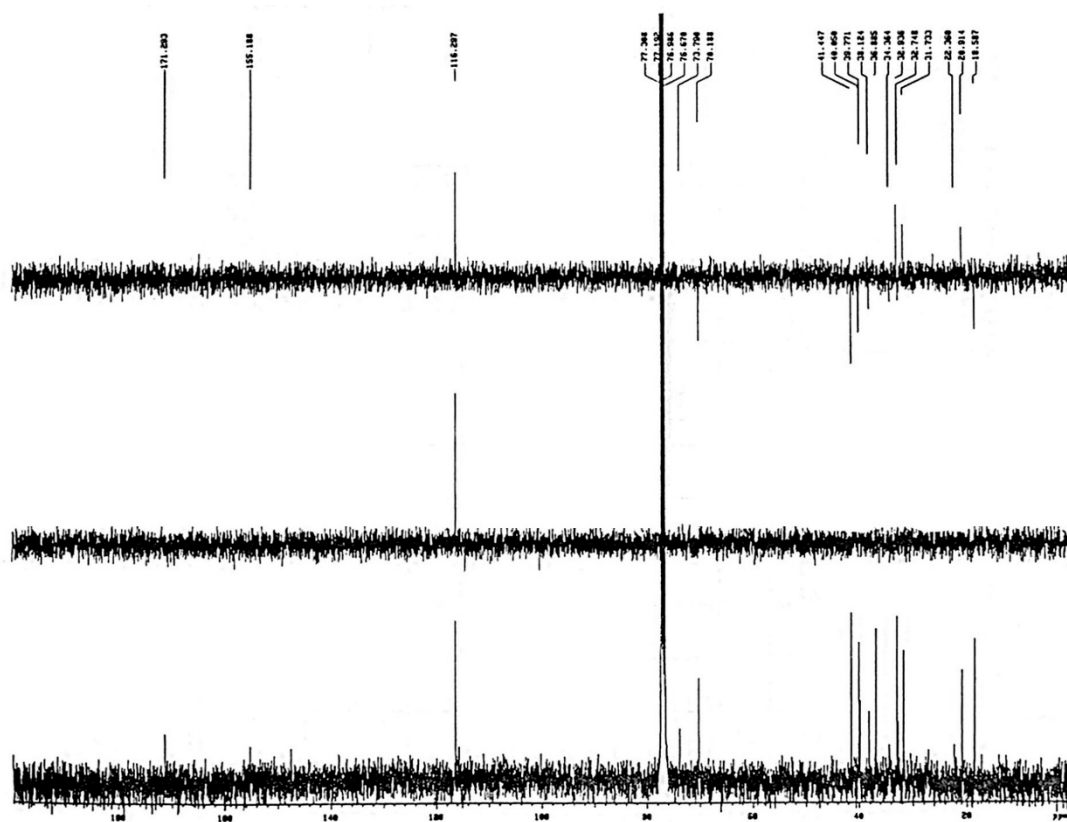

Figure S2. DEPT spectrum of 12-acetoxywiddrol (**1**)

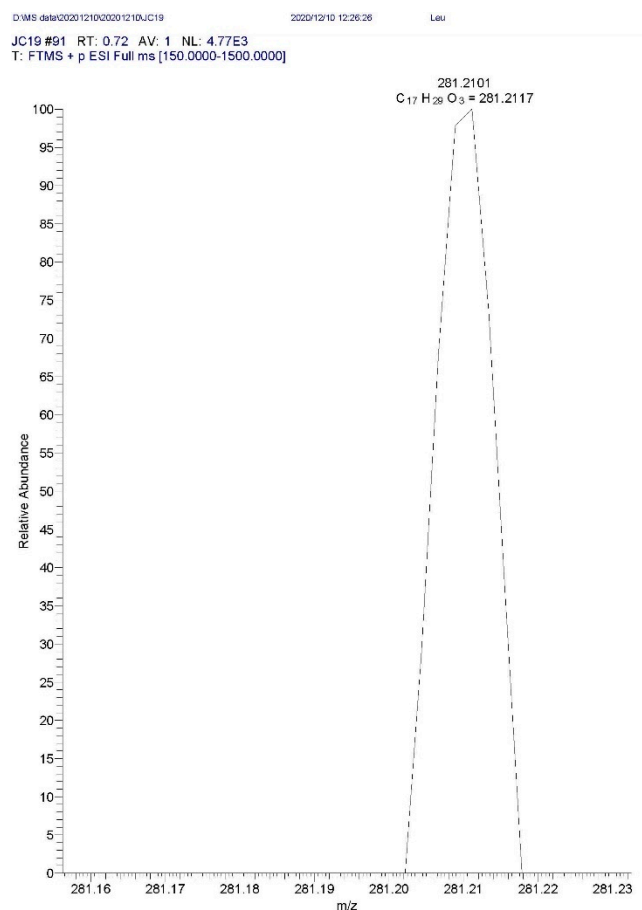

Figure S3. HRESIMS spectrum of 12-acetoxysiddrol (1)

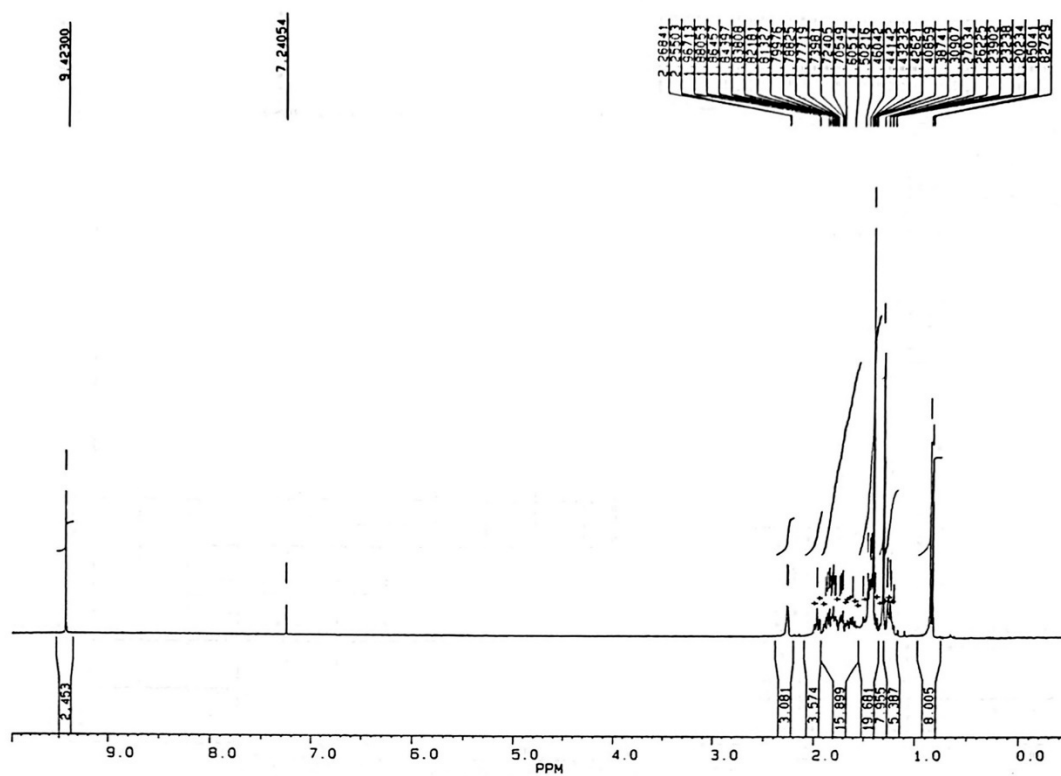

Figure S4. <sup>1</sup>H NMR spectrum of cedrol-13-al (2) in CDCl<sub>3</sub> at 300 MHz

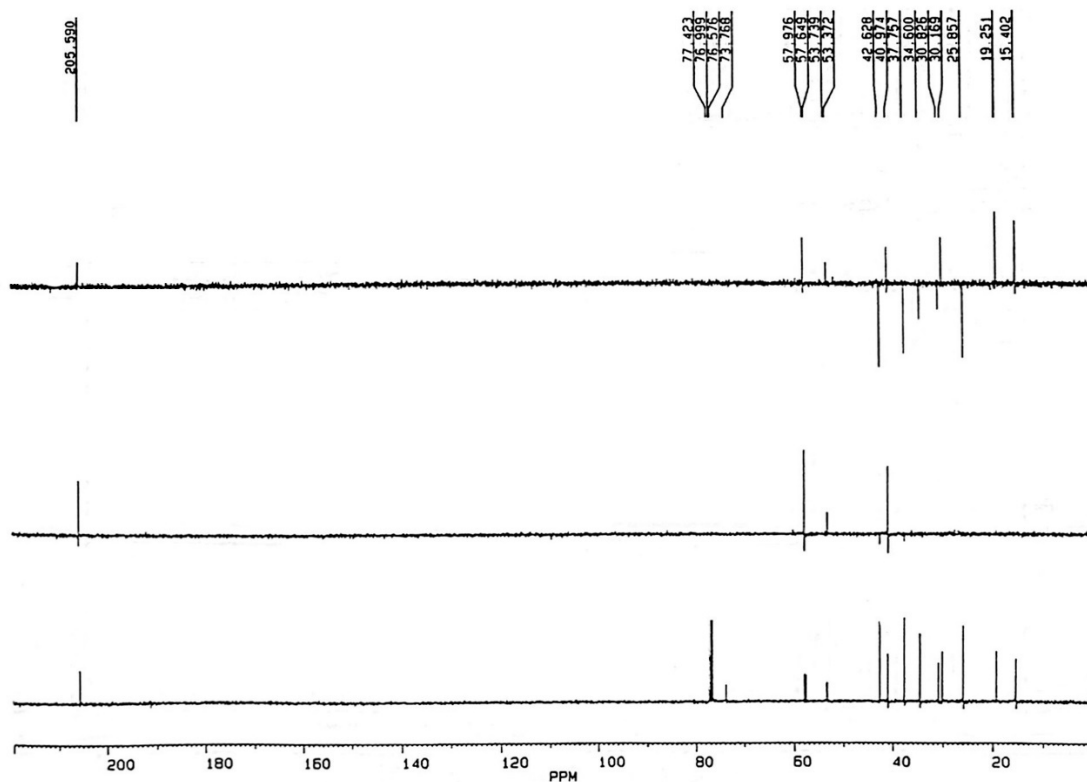

Figure S5. DEPT spectrum of cedrol-13-al (2)

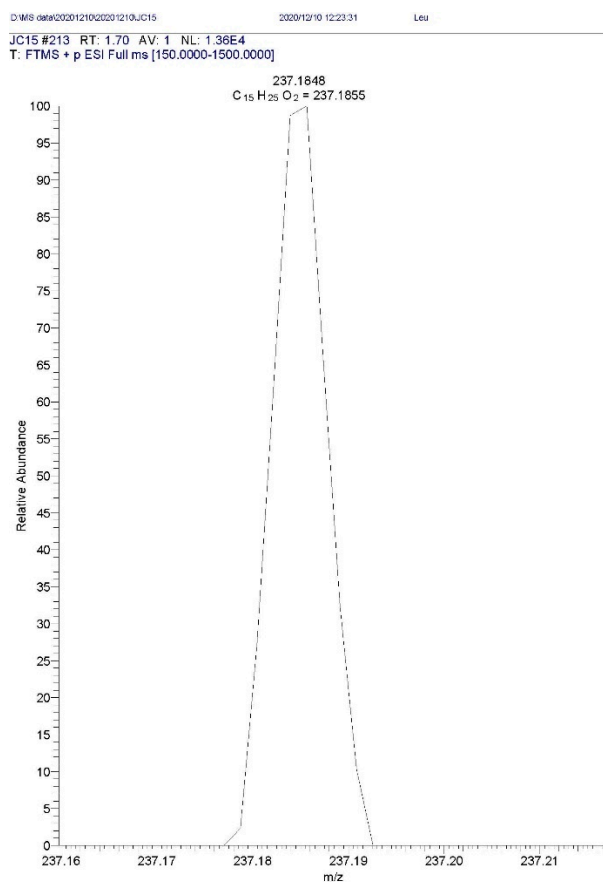

Figure S6. HRESIMS spectrum of cedrol-13-al (2)

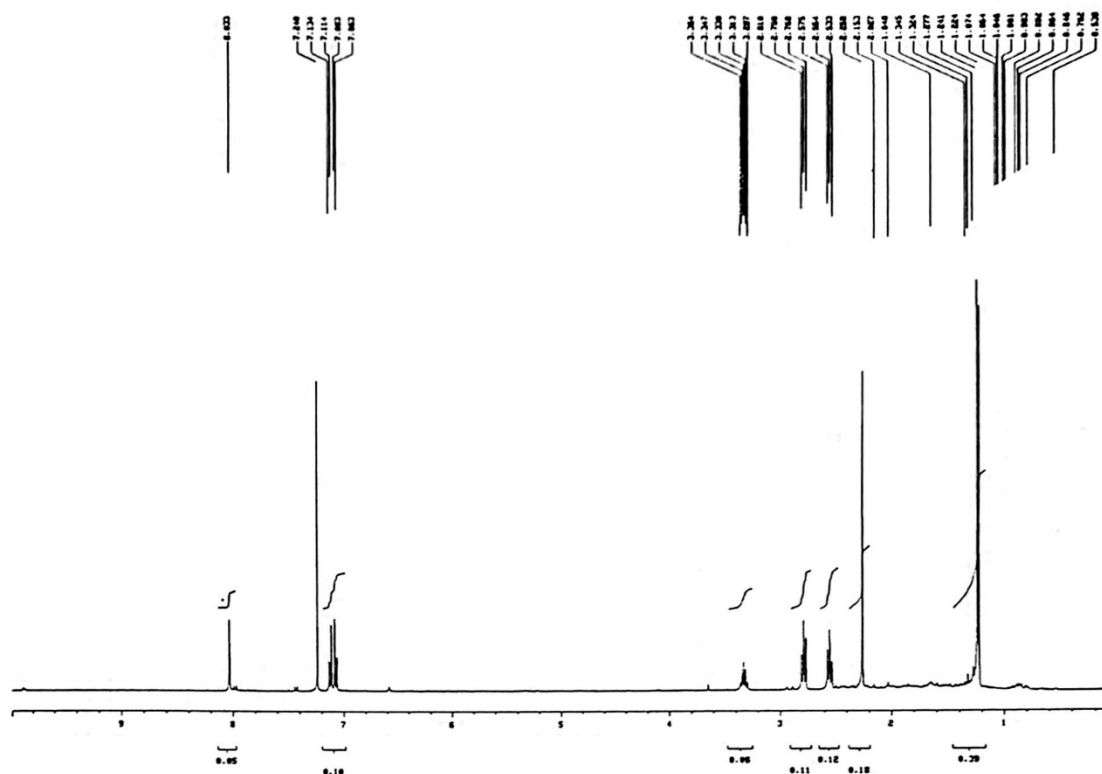

Figure S7.  $^1\text{H}$  NMR spectrum of  $\alpha$ -corocalen-15-oic acid (**3**) in  $\text{CDCl}_3$  at 400 MHz

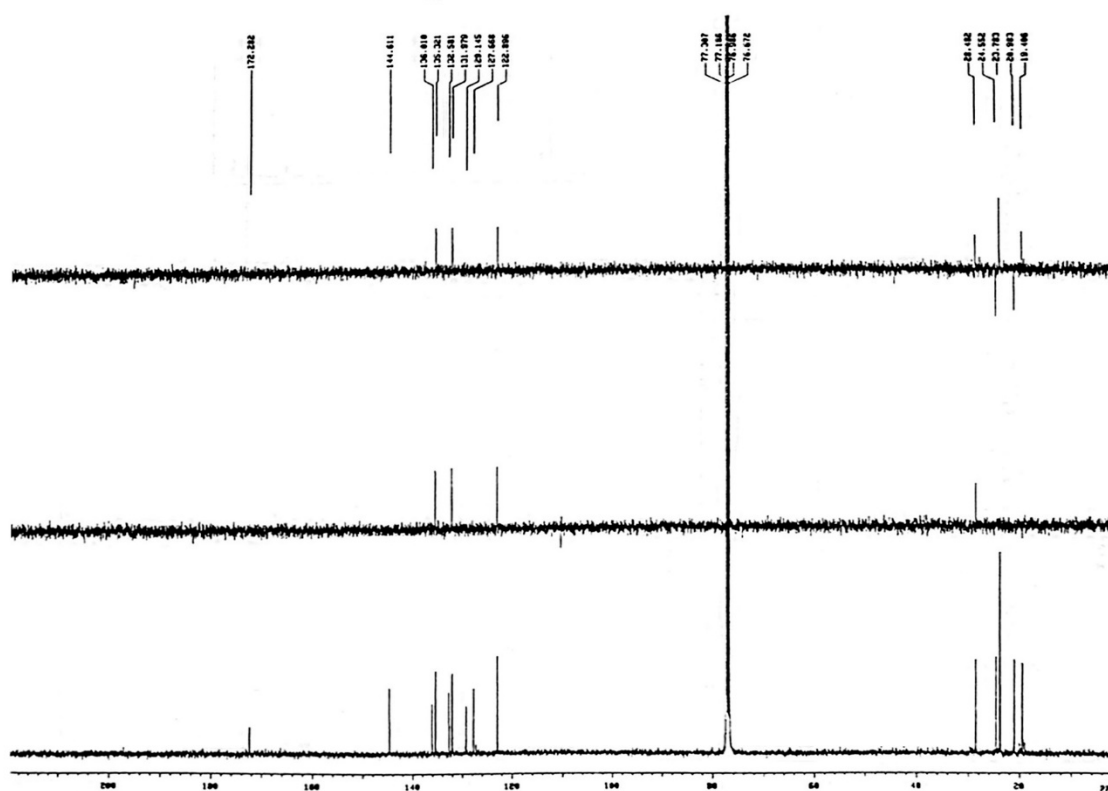

Figure S8. DEPT spectrum of  $\alpha$ -corocalen-15-oic acid (**3**)

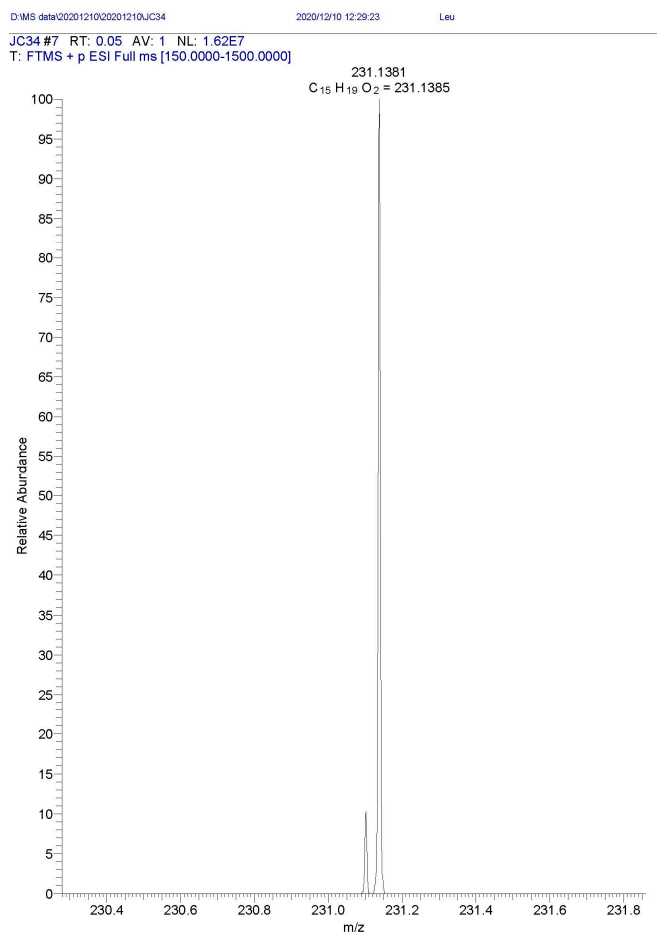

Figure S9. HRESIMS spectrum of  $\alpha$ -corocalen-15-oic acid (**3**)

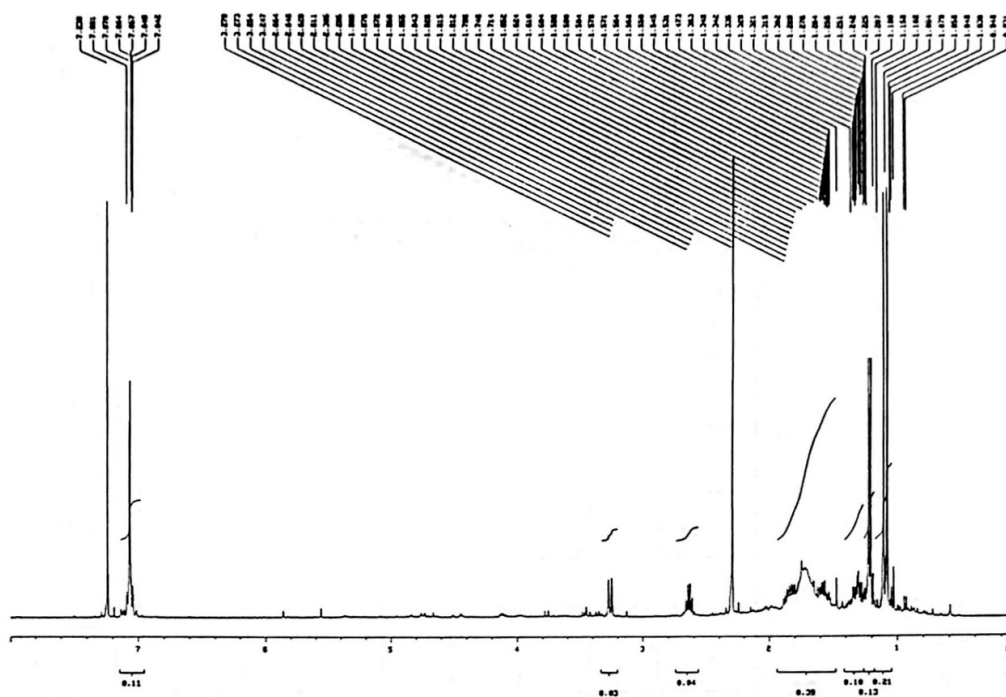

Figure S10. <sup>1</sup>H NMR spectrum of 1,3,5-bisaolatrien-10-hydroperoxy-11-ol (**4**) in CDCl<sub>3</sub> at 400 MHz



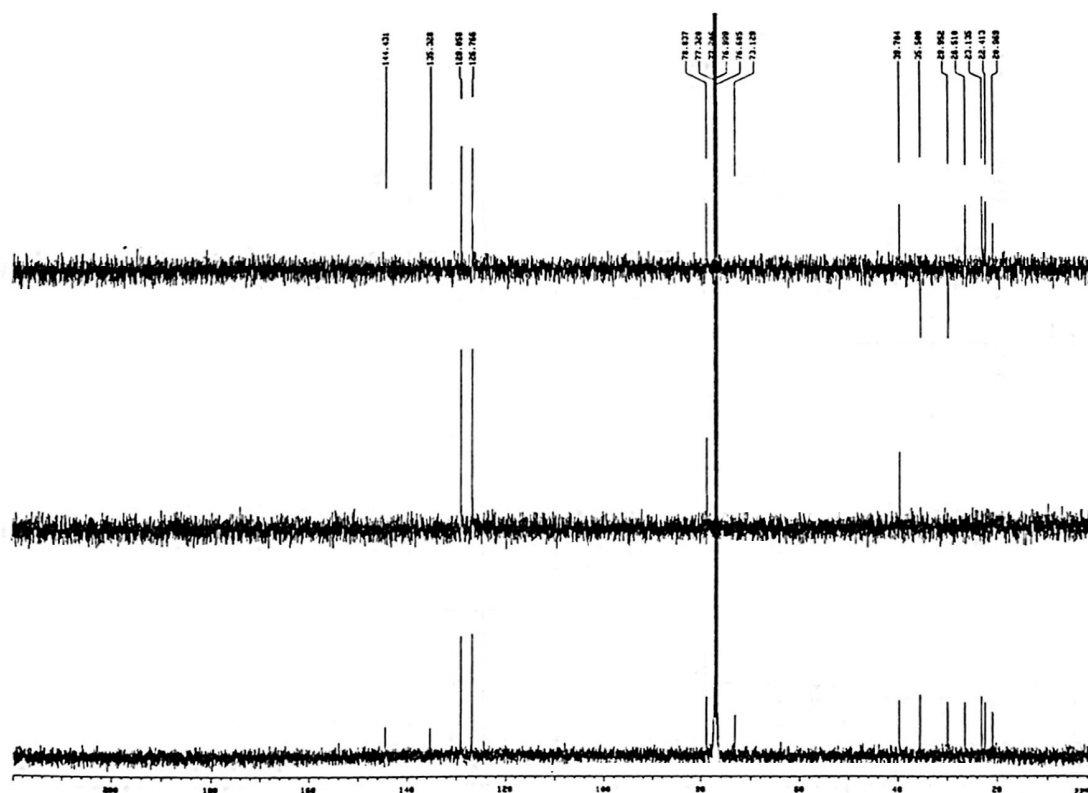

Figure S11. DEPT spectrum of 1,3,5-bisaoltrien-10-hydroperoxy-11-ol (4)

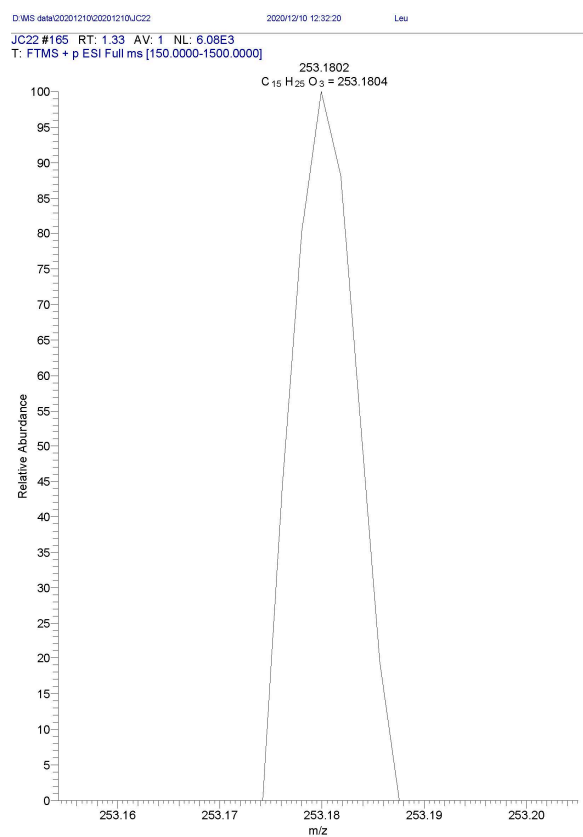

Figure S12. HRESIMS spectrum of 1,3,5-bisaoltrien-10-hydroperoxy-11-ol (4)



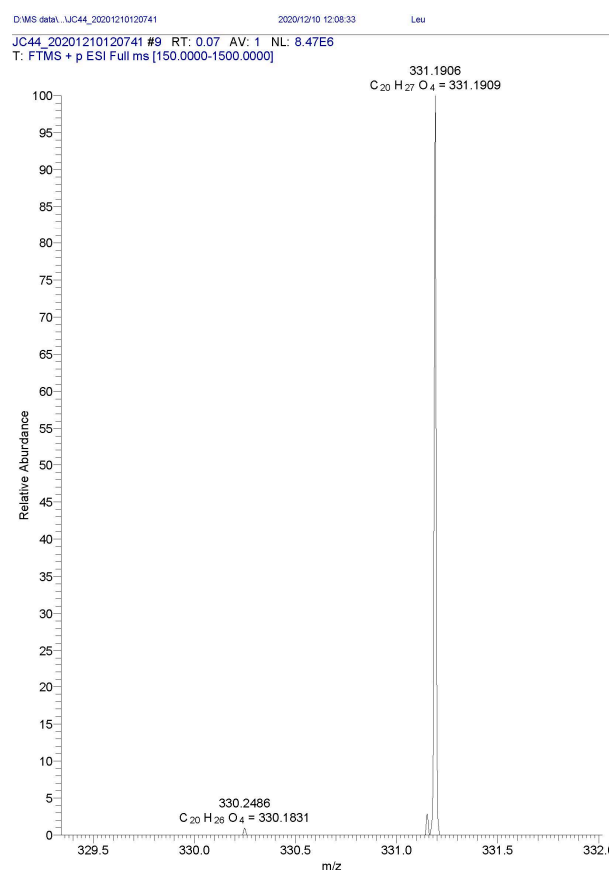

Figure S15. HRESIMS spectrum of 1 $\beta$ ,2 $\beta$ -epoxy-9 $\alpha$ -hydroxy-8(14),11-totaradiene-3,13-dione (**5**) in CDCl<sub>3</sub> at 400 MHz
